# Supplementary material
Source: PubMed Central journal article supplement (PMC6593624)
Supplement: jamaneurol-76-1079-s003.pdf [file jamaneurol-76-1079-s003.pdf]

## Data Sharing Statement

Cramer. Efficacy of Home-Based Telerehabilitation vs In-Clinic Therapy for Adults After Stroke. *JAMA Neurol.* Published June 24, 2019. 10.1001/jamaneurol.2019.1604

### Data

**Data available:** Yes

**Data types:** Deidentified participant data

**How to access data:** Data will be available for sharing through the NINDS Office of Clinical Research

**When available:** With publication

### Supporting Documents

**Document types:** None

### Additional Information

**Who can access the data:** researchers whose proposed use of the data has been approved

**Types of analyses:** appropriate scientific queries

**Mechanisms of data availability:** without investigator support
